# Supplementary material for: Abnormal expression of TGF-beta type II receptor isoforms contributes to acute myeloid leukemia
Source: PubMed Central journal article supplement (PMC5354639; doi:10.18632/oncotarget.14325), 2016-12-28
Supplement: oncotarget-08-10037-s001.pdf [file oncotarget-08-10037-s001.pdf]

## Abnormal expression of TGF-beta type II receptor isoforms contributes to acute myeloid leukemia

### SUPPLEMENTARY TABLES AND FIGURES

**Supplementary Table 1: Quantitative RT-PCR analysis of TβRII mRNA in K562 cells stably expressing TβRII or TβRII-B**

| Cells        | TβRII (CT value) | β-actin (CT value) | Fold change (2 <sup>-ΔΔCT</sup> ) |
|--------------|------------------|--------------------|-----------------------------------|
| K562         | 30.98 ± 0.66     | 16.22 ± 0.43       | 1.00                              |
| K562/TβRII-B | 22.13 ± 0.26     | 19.97 ± 0.56       | 6208.4 ± 540.76**                 |
| K562/NEO     | 31.73 ± 0.53     | 17.03 ± 0.24       | 1.04 ± 0.11                       |
| K562/TβRII   | 17.88 ± 0.33     | 16.04 ± 0.15       | 7750.10 ± 669.62**                |

The experiments were performed in triplicate. The data are expressed as the mean ± SEM. \*\*P < 0.01, compared to K562 cells. K562/NEO is an empty vector control cell line.

**Supplementary Table 2: Quantitative RT-PCR analysis of TβRII mRNA in HL60 cells stably expressing TβRII or TβRII-B**

| Cells        | TβRII (CT value) | β-actin (CT value) | Fold change (2 <sup>-ΔΔCT</sup> ) |
|--------------|------------------|--------------------|-----------------------------------|
| HL60         | 21.06 ± 0.15     | 15.47 ± 0.40       | 1.00                              |
| HL60/TβRII-B | 16.65 ± 0.22     | 16.38 ± 0.28       | 39.95 ± 4.11**                    |
| HL60/NEO     | 20.39 ± 0.09     | 15.03 ± 0.38       | 1.17 ± 0.19                       |
| HL60/TβRII   | 15.52 ± 0.45     | 15.33 ± 0.33       | 42.22 ± 3.76**                    |

The experiments were performed in triplicate. The data are expressed as the mean ± SEM. \*\*P < 0.01, compared to HL60 cells. HL60/NEO is an empty vector control cell line.

**Supplementary Table 3: Cell cycle analysis of HL60 cells stably expressing TβRII or TβRII-B after incubation with 1 ng/mL TGF-β1 for 24 h or 48 h**

| %    | HL60            | HL60/<br>TβRII- B | HL60/<br>TβRII  | HL60<br>24 h    | HL60/<br>TβRII-B<br>24 h | HL60/<br>TβRII<br>24 h | HL60<br>48 h    | HL60/<br>TβRII-B<br>48 h | HL60/<br>TβRII<br>48 h |
|------|-----------------|-------------------|-----------------|-----------------|--------------------------|------------------------|-----------------|--------------------------|------------------------|
| G1   | 38.57 ±<br>0.77 | 39.05 ±<br>0.16   | 38.12 ±<br>0.48 | 43.53 ±<br>1.02 | 53.55 ±<br>0.54          | 43.21 ±<br>1.29        | 49.16 ±<br>1.83 | 59.19 ±<br>0.76          | 51.62 ±<br>0.38        |
| S    | 45.25<br>±1.55  | 48.58 ±<br>0.25   | 45.78 ±<br>0.59 | 35.47 ±<br>0.74 | 30.41 ±<br>0.08          | 34.59 ±<br>0.44        | 35.52 ±<br>2.26 | 25.97 ±<br>0.86          | 32.61 ±<br>0.26        |
| G2/M | 16.18<br>±1.75  | 12.37 ±<br>0.35   | 16.09 ±<br>0.26 | 21 ± 0.41       | 16.03 ±<br>0.50          | 22.21 ±<br>1.13        | 15.32 ±<br>0.46 | 14.84 ±<br>1.61          | 15.77 ±<br>0.63        |

The data are representative of two independent experiments.

**Supplementary Table 4: Cell cycle analysis of K562 cells stably expressing TβRII or TβRII-B after incubation with 1 ng/mL TGF-β1 for 24 h or 48 h**

| %    | K562            | K562/<br>TβRII- B | K562/<br>TβRII  | K562 24 h       | K562/<br>TβRII-B<br>24 h | K562/<br>TβRII<br>24 h | K562 48 h       | K562/<br>TβRII-B<br>48 h | K562/<br>TβRII<br>48 h |
|------|-----------------|-------------------|-----------------|-----------------|--------------------------|------------------------|-----------------|--------------------------|------------------------|
| G1   | 33.57 ±<br>0.75 | 34.05 ±<br>0.15   | 35.12 ±<br>0.45 | 38.53 ±<br>1.08 | 48.55 ±<br>0.55          | 38.21 ±<br>1.30        | 44.16 ±<br>1.53 | 55.19 ±<br>0.96          | 46.62 ±<br>0.48        |
| S    | 55.35 ±<br>1.35 | 58.68 ±<br>0.55   | 55.38 ±<br>0.69 | 45.57 ±<br>0.78 | 40.45 ±<br>0.28          | 44.49 ±<br>0.54        | 45.32 ±<br>1.26 | 35.87 ±<br>1.86          | 42.51 ±<br>1.26        |
| G2/M | 11.18 ±<br>1.05 | 7.37 ± 0.65       | 11.09 ±<br>0.56 | 16 ± 0.47       | 11.03 ±<br>0.55          | 17.21 ±<br>1.03        | 10.32 ±<br>0.86 | 9.84 ± 1.65              | 10.77 ±<br>0.68        |

The data are representative of two independent experiments.

**Supplementary Table 5: Proteins that exhibited increased phosphorylation in HL60/TβRII-B cells compared to HL60/TβRII cells**

|                            | p-Smad2<br>(Ser467) | p-Smad1<br>(Ser465) | p-Smad2/3<br>(Thr8) | p-Smad3<br>(Thr179) | p-Smad3<br>(Ser425) | p-PKCζ<br>(Thr410) | p-AKT<br>(Ser473) | p-SAPK/<br>JNK<br>(Thr185) |
|----------------------------|---------------------|---------------------|---------------------|---------------------|---------------------|--------------------|-------------------|----------------------------|
| TβRII-B /<br>control 0.5 h | 1.23                | 2.13                | 10.53               | 1.86                | 5.58                | 8.05               | 1.77              | 2.38                       |
| TβRII /<br>control 0.5 h   | 0.91                | 0.66                | 1.90                | 1.22                | 2.38                | 4.39               | 1.26              | 1.2                        |
| TβRII-B /<br>TβRII 0.5 h   | 1.35                | 3.22                | 5.54                | 1.52                | 2.34                | 1.83               | 1.41              | 1.98                       |
| TβRII-B /<br>control 2 h   | 2.23                | 10.13               | 11.53               | 8.86                | 8.58                | 6.9                | 2.76              | 2.18                       |
| TβRII /<br>control 2 h     | 0.71                | 2.66                | 2.90                | 6.52                | 6.38                | 7.7                | 1.36              | 1.0                        |
| TβRII-B/<br>TβRII 2 h      | 3.18                | 3.81                | 3.97                | 1.36                | 1.34                | 0.89               | 2.03              | 2.18                       |

Supplementary Table 6: Clinical characteristics of AML patients and expression of TβRII expression

| Patient characteristics | No. of patients (%) |                      |                       | P-value |
|-------------------------|---------------------|----------------------|-----------------------|---------|
|                         | AML patients        | TβRII <sup>low</sup> | TβRII <sup>high</sup> |         |
|                         | (n = 138)           | (n = 78)             | (n = 60)              |         |
| Age, years              |                     |                      |                       |         |
| Median                  | 48                  | 55                   | 43                    | > 0.05  |
| Range                   | 17-79               | 19-79                | 17-77                 |         |
| Sex                     |                     |                      |                       |         |
| Male                    | 84 (60.9%)          | 48 (61.5%)           | 36 (60%)              | > 0.05  |
| Female                  | 54 (39.1%)          | 30 (38.5%)           | 24 (40%)              |         |
| AML type                |                     |                      |                       |         |
| APL                     | 12 (8.7%)           | 10 (12.8%)           | 2 (3.3%)              | > 0.05  |
| No APL                  | 126 (91.3%)         | 68 (87.2%)           | 58 (96.7%)            |         |
| M0                      | 8 (5.8%)            | 4 (5.1%)             | 5 (8.6%)              |         |
| M1                      | 16 (11.6%)          | 6 (7.7%)             | 10 (17.2%)            |         |
| M2                      | 36 (26.1%)          | 20 (25.6%)           | 16 (27.6%)            |         |
| M4                      | 4 (2.9%)            | 2 (2.6%)             | 3 (5.2%)              |         |
| M5                      | 62 (44.9%)          | 36 (46.2%)           | 24 (41.3%)            |         |
| Karyotype               |                     |                      |                       |         |
| Favorable + standard    | 128 (92.7%)         | 74 (94.9%)           | 54 (90%)              | > 0.05  |
| Unfavorable             | 10 (7.3%)           | 4 (5.1%)             | 6 (10%)               |         |
| FLT3 status             |                     |                      |                       |         |
| FLT3 wild type          | 128 (92.7%)         | 74 (94.9%)           | 54 (90%)              | > 0.05  |
| FLT3 mutated            | 10 (7.3%)           | 4 (5.1%)             | 6 (10%)               |         |
| NPM-1 status            |                     |                      |                       |         |
| NPM-1 wild type         | 132 (95.7%)         | 74 (94.9%)           | 58 (96.7%)            | > 0.05  |
| NPM-1 mutated           | 6 (4.3%)            | 4 (5.1%)             | 2 (3.3%)              |         |

TβRII<sup>low</sup> and TβRII<sup>high</sup> represent the 20% of patients with the lowest and highest TβRII mRNA levels, respectively (the relative mRNA level is the ratio of the experimental data to the internal control data). P < 0.01 and P < 0.05,  $\chi^2$  analysis.

Supplementary Table 7: Quantitative real-time PCR primers and probes

| Primers | Sequence (5'–3')                                       | Probe (5'–3')       |
|---------|--------------------------------------------------------|---------------------|
| TβRII-B | CGATCCCACCGCACGTT<br>TCAGTGGATGGGCAGTCCTA              | CCACATCCGACTTCTG    |
| TβRII   | GCGTATCGCCAGCACGAT<br>CACCGTTGTTGTCAGTGAATCA           | TCAGAAGTCGGTTAATAAC |
| ABL1    | GCCTACAACAAGTTCTCCATCAAGT<br>CATAGGTAGCAATTTCCCAAAGCAA | ACGTCTGGGCATTTGG    |

Supplementary Table 8: RT-PCR primers

| Primers          | Sequence (5'-3')                                   | Length, bp                                 |
|------------------|----------------------------------------------------|--------------------------------------------|
| $\beta$ -actin   | GACTACCTCATGAAGATCCTCACC<br>TTCCTTAATGTCACGCACGATT | 85                                         |
| T $\beta$ RII    | CACCGCACGTTCCAGAAGTC<br>CACAGATGGAGGTGATGCTG       | T $\beta$ RII-B: 234<br>T $\beta$ RII: 159 |
| Bcl-2            | GGGTACGATAACCGGGAGAT<br>CTGAAGAGCTCCTCCACCAC       | 395                                        |
| c-Myc            | TCCTGGCAAAAGGTCAGAGT<br>GTTGTGTGTTCCGCTTGA         | 265                                        |
| p21              | ACCGAGACACCACTGGAG<br>CGAGGCACAAGGGTACAA           | 203                                        |
| hTERT            | CGGAAGAGTGTCTGGAGCAA<br>GGATGAAGCGGAGTCTGGA        | 145                                        |
| TNF $\alpha$     | ATGGCGTGGAGCTGAGAGATA<br>GGAAGGTTGGATGTTTCGTCCT    | 382                                        |
| IL-3             | CTTCAACAACCTCAATGGGG<br>AATTCATCTGATGCCGCAGG       | 441                                        |
| GM-CSFR $\alpha$ | GCATTCCTCCTGATCCCAGAG<br>CCCTCCTTCTCTTTGAGTTTCG    | 436                                        |
| G-CSFR           | GGATCCGGGTCCATGGG<br>TTAAGAGGCAGGCCCAAGAAG         | 78                                         |

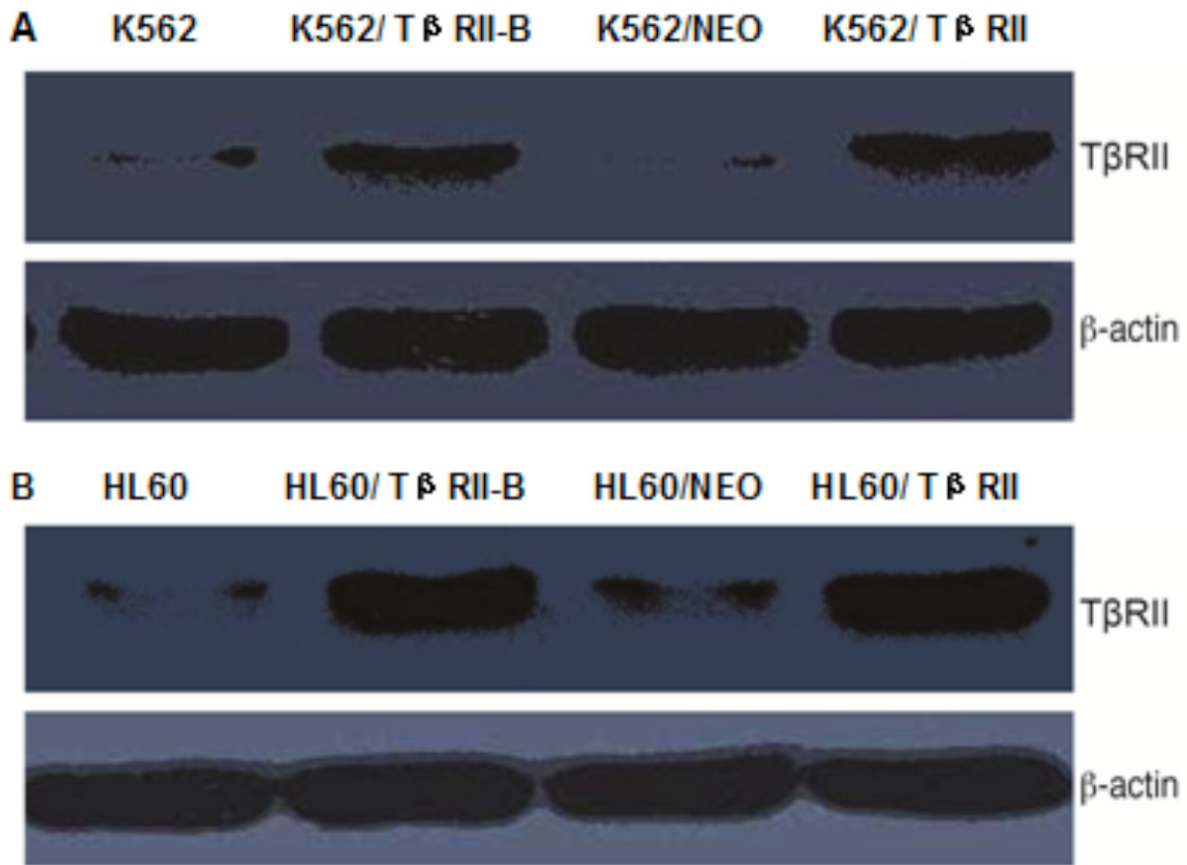

**Supplementary Figure 1: Western blot analyses of T $\beta$ RII expression in K562 and HL60 cells stably expressing T $\beta$ RII or T $\beta$ RII-B. A.** T $\beta$ RII expression in K562 cells stably expressing T $\beta$ RII or T $\beta$ RII-B. **B.** T $\beta$ RII expression in HL60 cells stably expressing T $\beta$ RII or T $\beta$ RII-B. K562/NEO and HL60/NEO are empty vector control cell lines. The data are representative of two independent experiments.

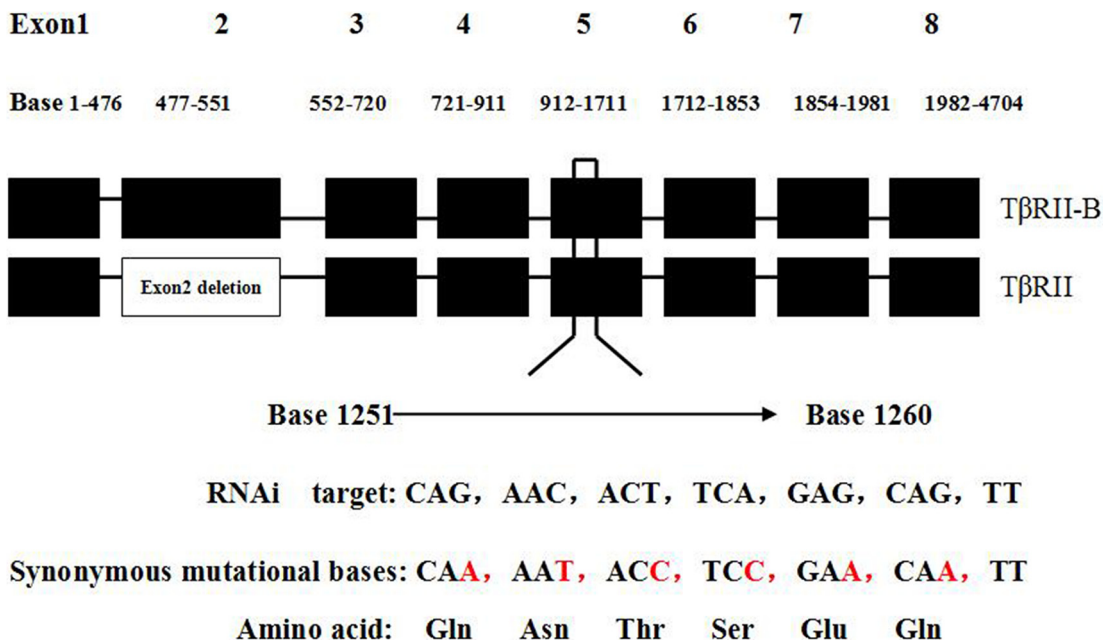

Supplementary Figure 2: Constructs for expression of TβRII splice variants containing synonymous mutations in the sequences targeted by TβRII siRNA.

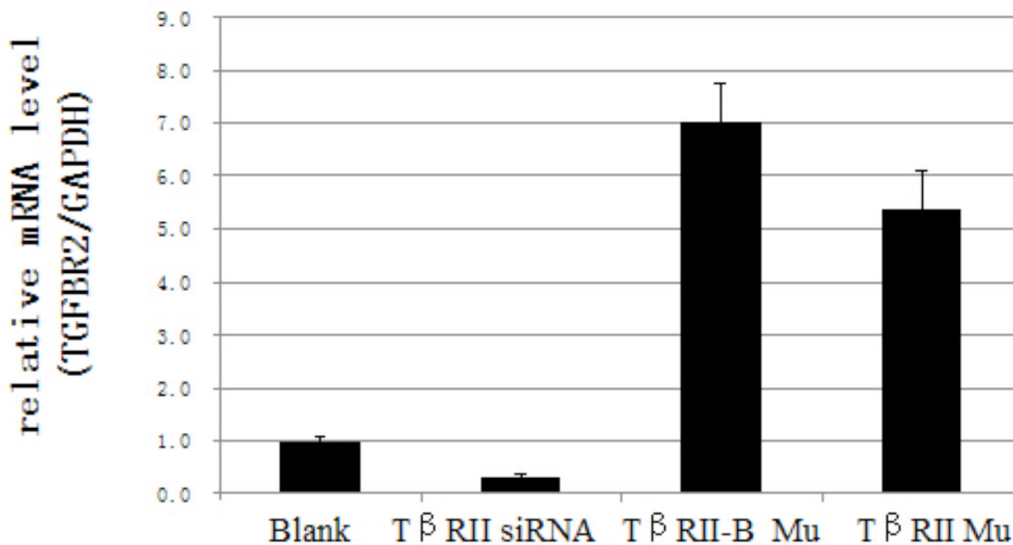

Supplementary Figure 3: Lentiviral infection of NB4 cells with TβRII siRNA and TβRII splice variants (Mu). At 96 hours post-infection, RNA was extracted and analyzed by RT-PCR. The relative expression of TβRII splice variants was quantified in each group by real-time PCR using isoform-specific primers.

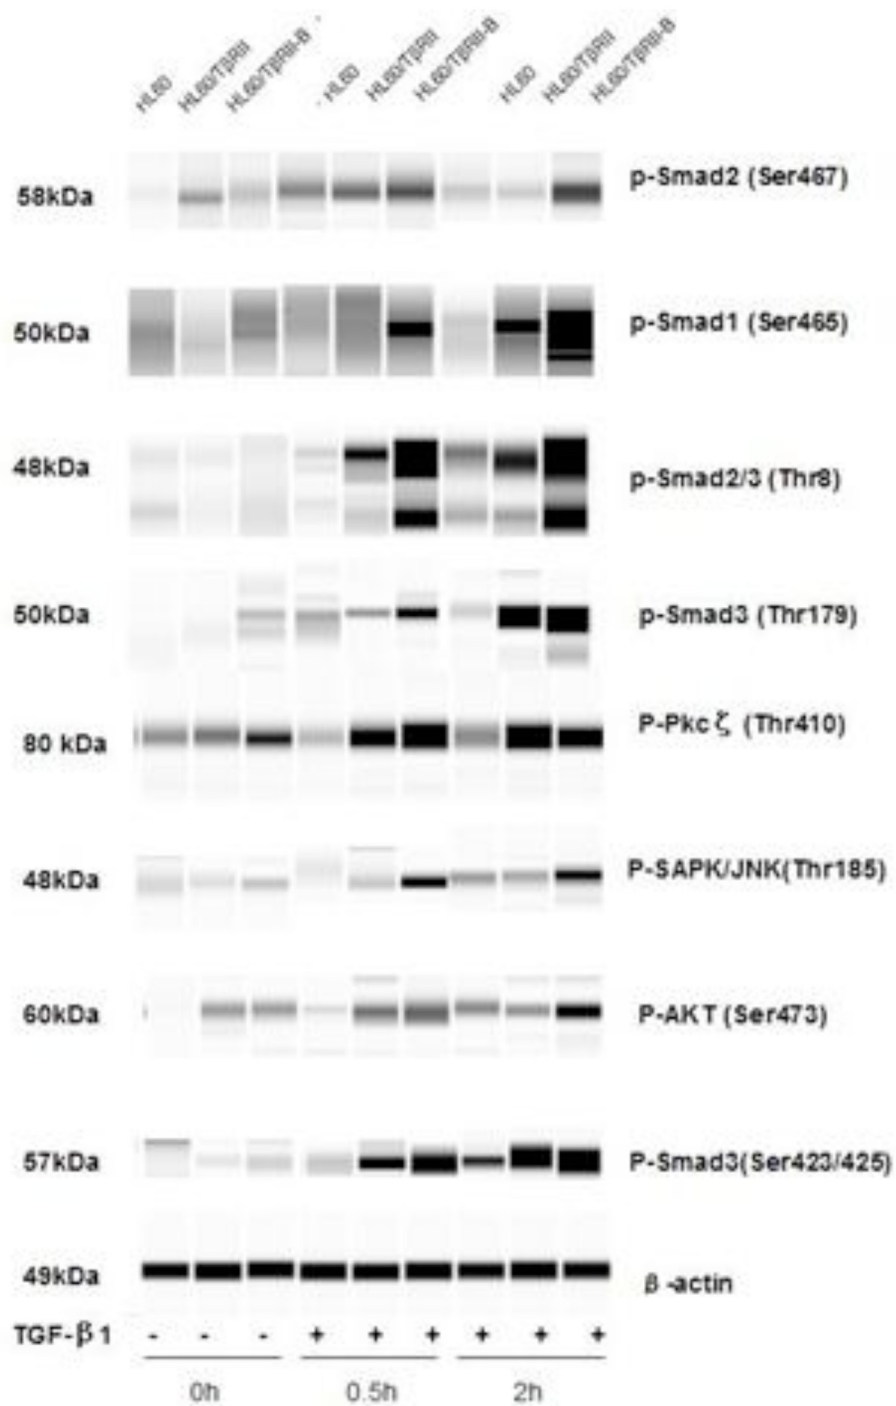

Supplementary Figure 4: Western blot analyses of protein phosphorylation in HL60/TβRII or HL60/TβRII-B cells after incubation with 1 ng/mL TGF-β1 for 0.5 h or 2h.
